# Supplementary material
Source: Royal Society of Chemistry journal article supplement (doi:10.1039/d6qi00923a)
Supplement: d6qi00923a1.pdf [file d6qi00923a1.pdf]

## **Electronic Supplementary Information**

### **Solvent-induced assembly and photocatalytic properties of atomically precise tellurotungstate-templated Ag clusters**

Jiwei Ning, Mengyun Zhao, Yuanyuan Dong\*, Manzhou Chi, Yurui Li, Ye qin Feng\*, Yun Qin, Hongjin Lv\*, Guo-Yu Yang

MOE Key Laboratory of Cluster Science, Beijing Key Laboratory of Intelligent Molecular Materials and High-throughput Manufacturing, School of Chemistry and Chemical Engineering, Beijing Institute of Technology, Beijing 102488, P. R. China

Corresponding author. E-mail: [dyy1111@bit.edu.cn](mailto:dyy1111@bit.edu.cn); [fyq@bit.edu.cn](mailto:fyq@bit.edu.cn); [hlv@bit.edu.cn](mailto:hlv@bit.edu.cn)

## Experimental Section

**Characterization.** The FT–IR spectra were performed on a Bruker Tensor II spectrometer in the range of 4000–400  $\text{cm}^{-1}$ . Solid-state UV–vis spectra were recorded on a Techcomp UV 2600 spectrophotometer at room temperature within the wavelength range of 220–800 nm. Powder XRD patterns were performed on a MiniFlex 600 diffractometer with a Cu-K $\alpha$  X–ray radiation source. The X–ray Photoelectron Spectrum (XPS) was recorded on a PHI5000 Versaprobe III. Thermogravimetric analysis (TGA) was conducted using a STA 449 F3/F5 thermal analyzer at a heating rate of 10  $^{\circ}\text{C}/\text{min}$  under a  $\text{N}_2$  atmosphere, in the temperature range of 30 to 800  $^{\circ}\text{C}$ . Photothermal measurements were performed using a Laser MGL-III-465nm-300mW system. The photothermal behavior of the sample was monitored using a thermal imaging camera (Fotric 326C). Infrared images and real-time temperature data were extracted from the video recordings using FLIR Tools software.

**Single-Crystal X-ray Crystallography:** Suitable single crystals of **Ag60** and **Ag46** were selected under an optical microscope and protected from decomposition by coating with Paratone-N oil. The crystals were then mounted on loops, and X-ray diffraction data were collected at 100 K on a Rigaku Oxford Diffraction XtaLAB Synergy diffractometer using Mo K $\alpha$  radiation ( $\lambda = 0.71073 \text{ \AA}$ , graphite monochromator). All data processing steps, including collection, indexing, and unit-cell refinement, were conducted using the CrysAlisPro software suite. The structures were solved with the Olex2 and the SHELXT structure solution program using Charge Flipping<sup>1</sup> and refined with the SHLXL refinement package using Least Squares minimization.<sup>2</sup> All non-hydrogen atoms were refined anisotropically, while hydrogen atoms attached to carbon were placed in calculated positions and refined isotropically using a riding model. Appropriate geometric and anisotropic displacement parameter (ADP) restraints were imposed on the relevant atoms within the cluster. Some disagreeable reflections were omitted by OMIT orders. Crystal structure graphics were carried out by using Diamond 4 software. CCDC 2546840 and 2546839 provide the additional crystallographic data for **Ag60** and **Ag46**, respectively. The crystallographic data can be found from The Cambridge Crystallographic Data Centre via [www.ccdc.cam.ac.uk/data\\_request/cif](http://www.ccdc.cam.ac.uk/data_request/cif).

**Bond valence sum (BVS) calculation:** The BVS values were calculated by the expression for the variation of the length  $r_{ab}$  of a bond between two atoms a and b in observed crystal with valence  $V_a$ .

$$V_a = \sum \exp\left(\frac{r_0 - r_{ab}}{B}\right)$$

where B is constant equal to 0.37 Å,  $r_0$  is bond valence parameter for a given atom pair.<sup>3</sup>

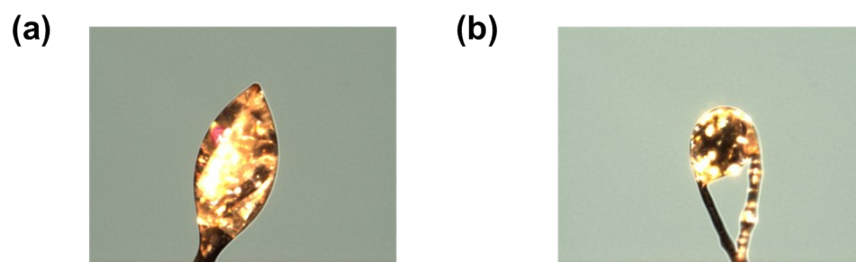

**Fig. S1** Digital photograph of single crystal of (a) **Ag60** and (b) **Ag46**.

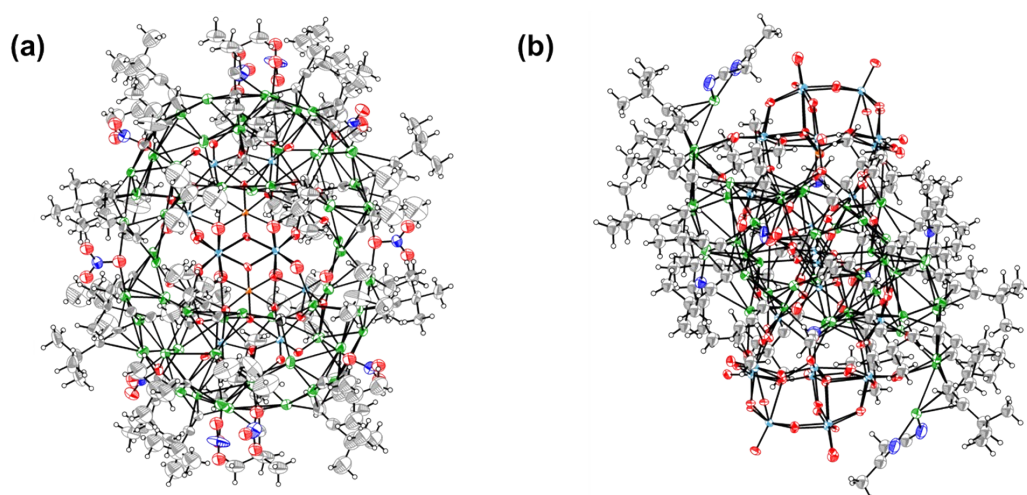

**Fig. S2** A displacement ellipsoid plot of (a) **Ag60** and (b) **Ag46**. Non-H atoms are represented by ellipsoids at the 50% probability. Color codes: Ag, green; Te, orange; W, light blue; O, red; C, gray; N, dark blue; H, white.

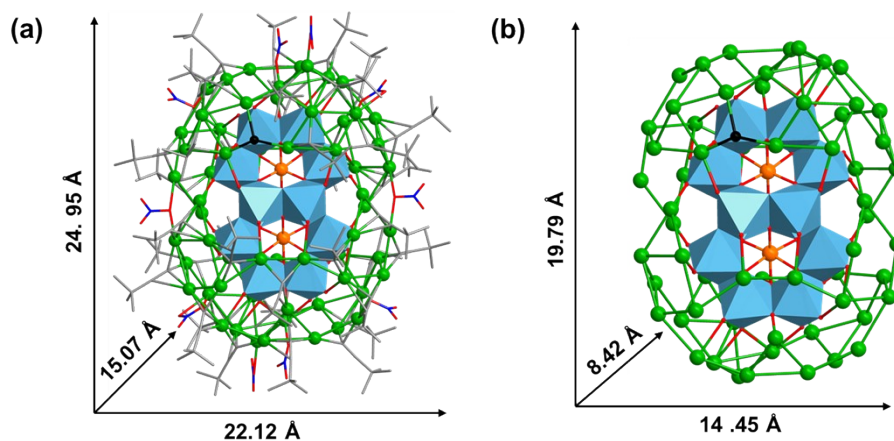

**Fig. S3** X-ray structures and sizes of (a) **Ag60** cluster. (b) (TeW<sub>6</sub>O<sub>24</sub>)<sub>2</sub>@Ag<sub>60</sub> skeleton Color codes: Ag, green; Te, orange; W, light blue; O, red; C, gray; N, dark blue; {WO<sub>6</sub>}, light blue polyhedron.

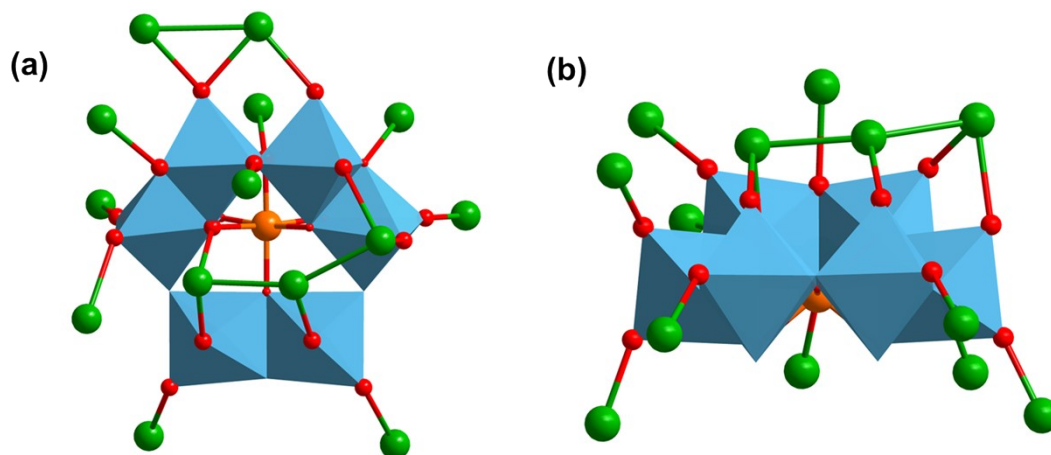

**Fig. S4** (a) and (b) Coordination modes of the  $[\text{TeW}_6\text{O}_{14}]^{6-}$  anion toward 14 silver atoms along two directions in  $\text{Ag}_{60}$ , featuring both terminal and bridging O-atom coordination. Color codes: Ag, green; O, red; Te, orange.

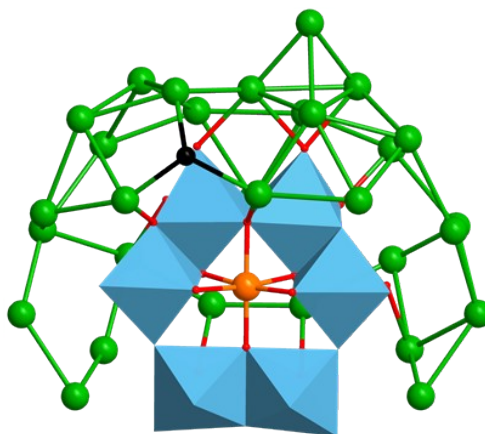

**Fig. S5**  $[(\text{TeW}_6\text{O}_{24})@\text{Ag}_{30}\text{Cl}]$  subunit. Color codes: Ag, green; O, red; Te, orange; Cl, black.

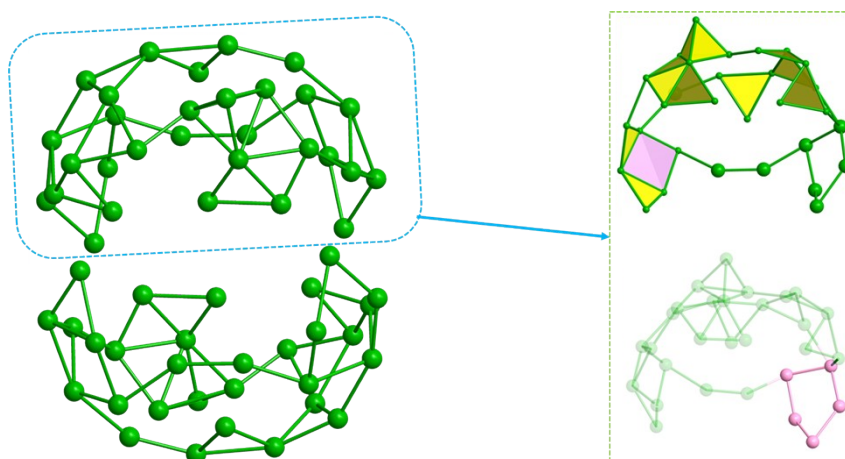

**Fig. S6** The silver shell of the  $\text{Ag}_{60}$  cluster. Left: overall structure; right: Ag triangles (yellow), squares (purple), and pentagons (pink). Color codes: Ag, green, pink.

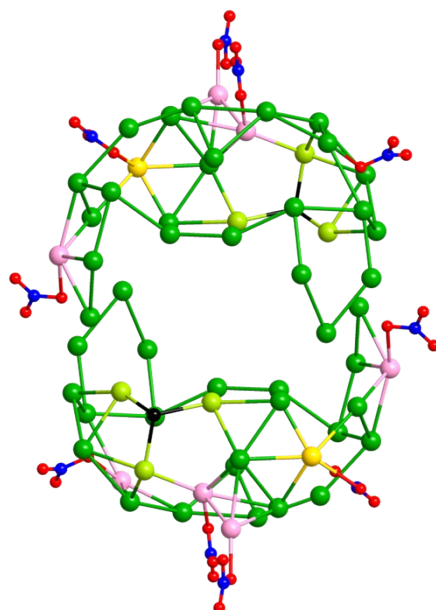

**Fig. S7** The coordination modes of the  $\text{Cl}^-$  and  $\text{NO}_3^-$  ions within the  $\text{Ag}_{60}$  cluster. Color codes: Ag, green, pink, yellow, yellow-green; O, red; N, dark blue; Cl, black.

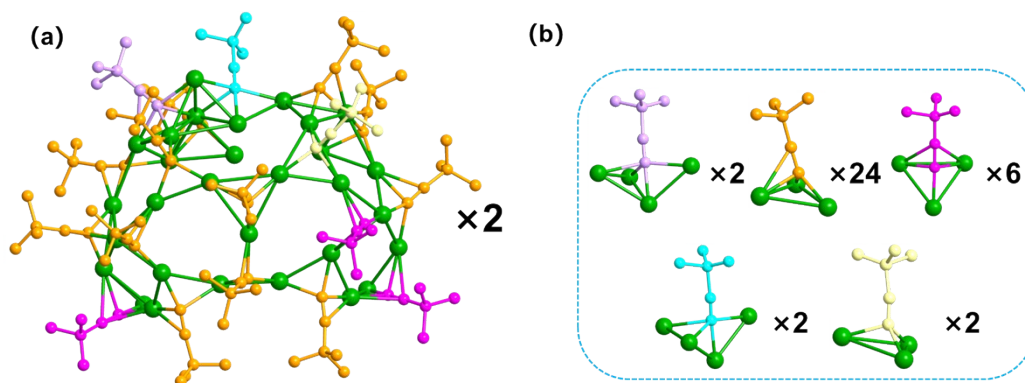

**Fig. S8** (a) The 18  $t\text{BuC}\equiv\text{C}^-$  ligands on the periphery of  $\text{Ag}_{30}$  shell. (b) the coordination modes of 36  $t\text{BuC}\equiv\text{C}^-$  ligands: 2 in  $\mu_4\text{-}\eta^1\text{:}\eta^1\text{:}\eta^1\text{:}\eta^1$ , 24 in  $\mu_3\text{-}\eta^1\text{:}\eta^1\text{:}\eta^2$ , 6 in  $\mu_3\text{-}\eta^1\text{:}\eta^2\text{:}\eta^2$ , 2 in  $\mu_4\text{-}\eta^1\text{:}\eta^1\text{:}\eta^1\text{:}\eta^1$ , 2 in  $\mu_3\text{-}\eta^1\text{:}\eta^1\text{:}\eta^1$ . Color codes: Ag, green; C, pink, yellow, purple, sky blue, pale yellow.

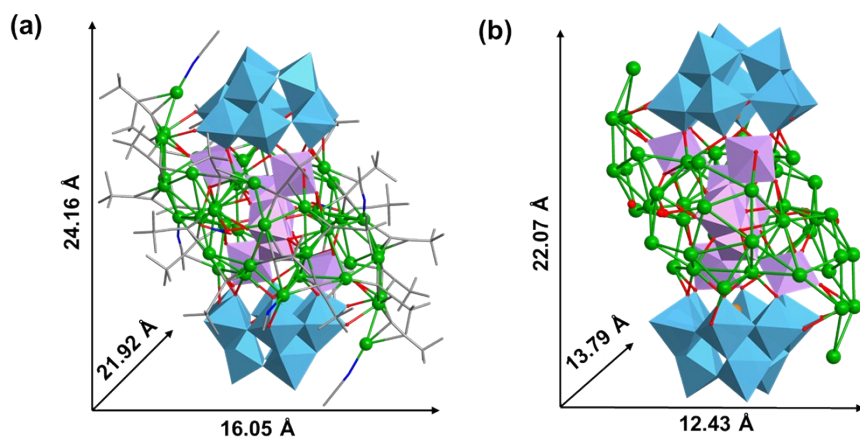

**Fig. S9** X-ray structures and sizes of (a) **Ag<sub>46</sub>** cluster. (b)  $(\text{TeW}_{13}\text{O}_{46})_2@Ag_{46}$  skeleton. Color codes: Ag, green; Te, orange; W, light blue; O, red; C, gray; N, dark blue;  $\{\text{WO}_6\}$ , light blue polyhedron, purple polyhedron.

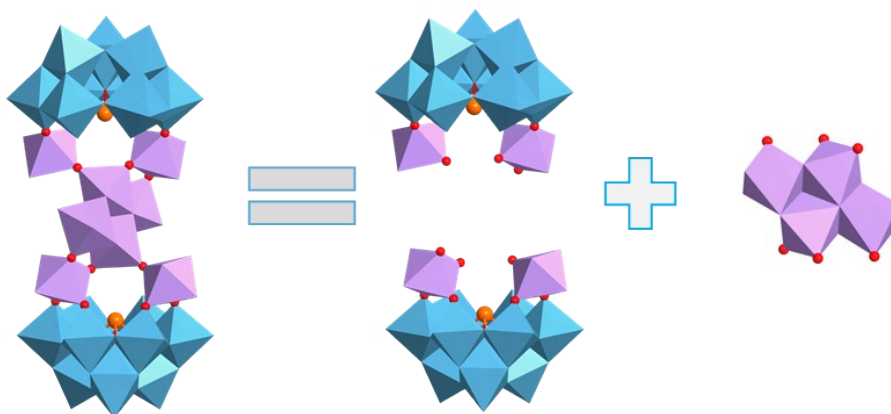

**Fig. S10** The structure is composed of two  $[\text{TeW}_{11}\text{O}_{41}]^{12-}$  units connected by shared terminal oxygen atoms (highlighted) from a central planar  $[\text{W}_4\text{O}_{16}]^{8-}$  segment. Color codes: Te, orange; W, light blue; O, red;  $\{\text{WO}_6\}$ , light blue polyhedron, purple polyhedron.

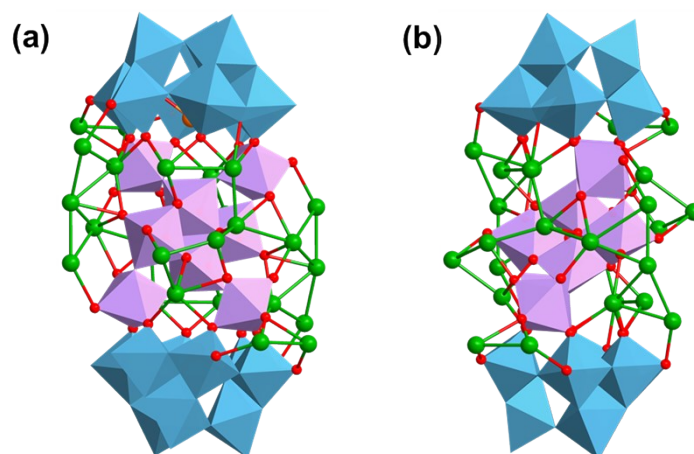

**Fig. S11** (a) and (b) The coordination modes of dumbbell-shaped  $[\text{Te}_2\text{W}_{26}\text{O}_{92}]^{20-}$  anion toward 24 silver atoms along two directions in **Ag<sub>46</sub>**. Color codes: Ag, green; O, red; Te, orange;  $\{\text{WO}_6\}$ , light blue polyhedron, purple polyhedron.

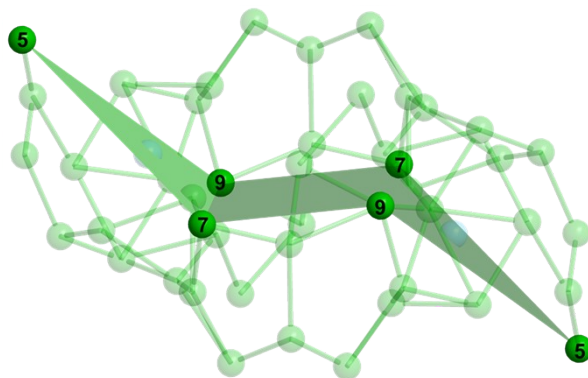

**Fig. S12** The overall framework of the silver skeleton adopts a chair-like conformation.

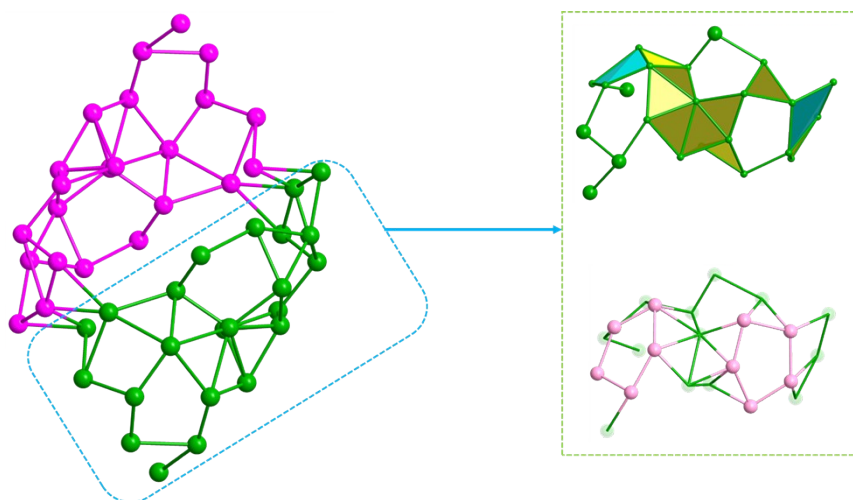

**Fig. S13** The silver shell of the  $\text{Ag}_{46}$  cluster. Left: overall structure; right: decomposition into Ag triangles (yellow), squares (blue), and pentagons (pink). Color codes: Ag, green, pink and purple.

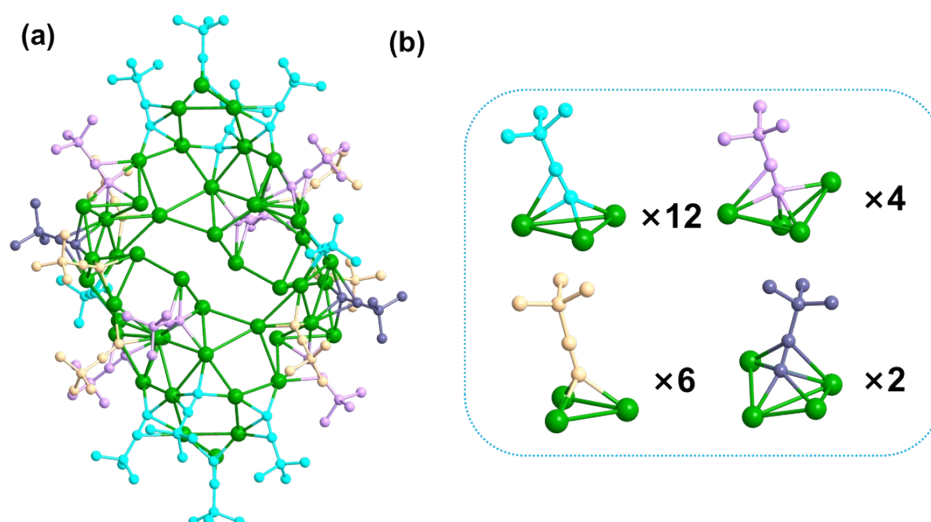

**Fig. S14** (a) The 24  $t\text{BuC}\equiv\text{C}^-$  ligands on the periphery of  $\text{Ag}_{46}$  shell. (b) the coordination modes of 24  $t\text{BuC}\equiv\text{C}^-$  ligands: 12 in  $\mu_3\text{-}\eta^1:\eta^1:\eta^2$ , 4 in  $\mu_4\text{-}\eta^1:\eta^1:\eta^1:\eta^2$ , 6 in  $\mu_3\text{-}\eta^1:\eta^1:\eta^1$ , 2 in  $\mu_4\text{-}\eta^1:\eta^1:\eta^2:\eta^2$ . Color codes: Ag, green; C, yellow, gray, sky blue, purple.

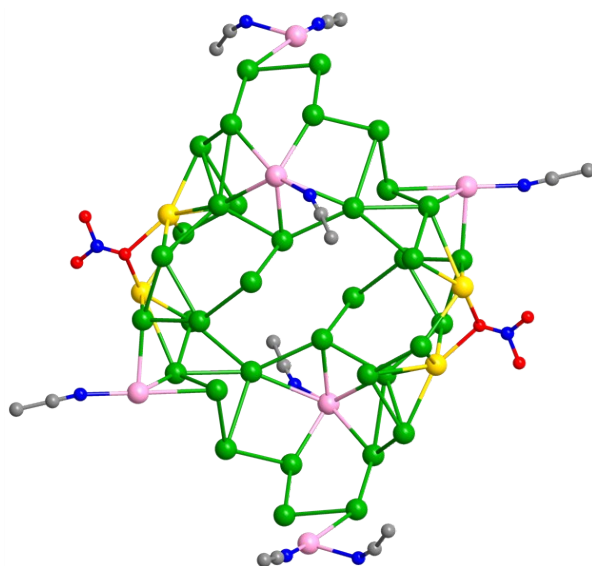

**Fig. S15** The coordination modes of the  $\text{CH}_3\text{CN}$  molecules and  $\text{NO}_3^-$  ions within the **Ag<sub>46</sub>** cluster. Color codes: Ag, green, pink, yellow; C, grey; O, red; N, dark blue.

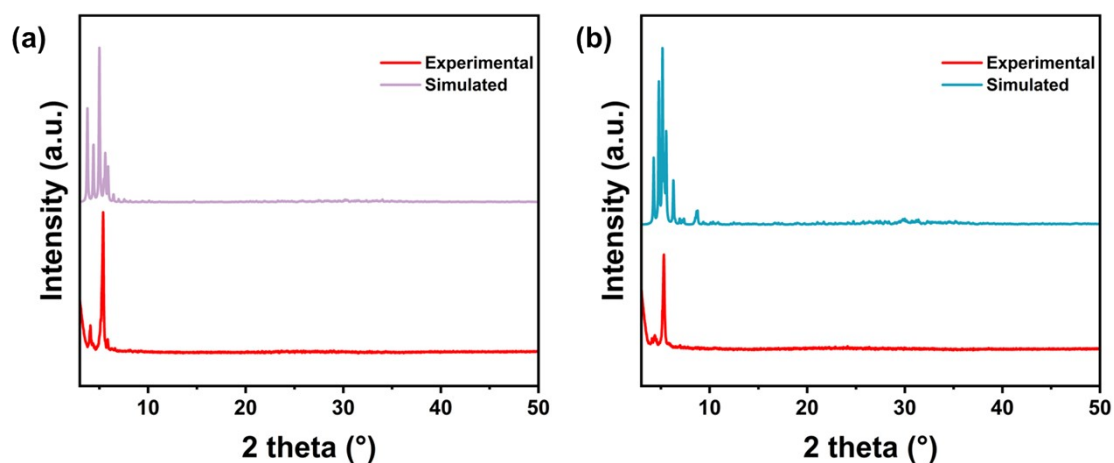

**Fig. S16** Experimental and simulated PXRD patterns of (a) **Ag<sub>60</sub>** and (b) **Ag<sub>46</sub>**.

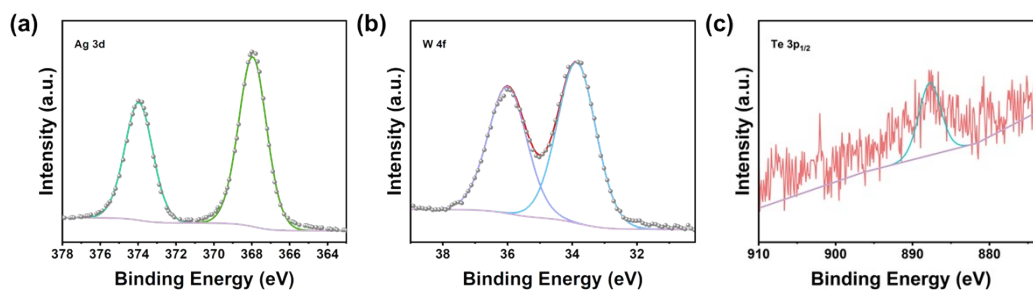

**Fig. S17** High resolution XPS spectra of (a) Ag 3d, (b) W 4f, (c) Te  $3p_{1/2}$  for **Ag<sub>60</sub>** cluster.

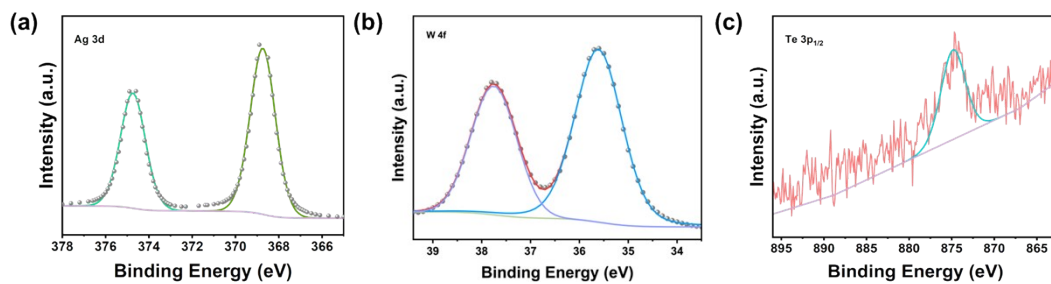

**Fig. S18** High resolution XPS spectra of (a) Ag 3d, (b) W 4f, (c) Te 3p<sub>1/2</sub> for Ag<sub>46</sub> cluster.

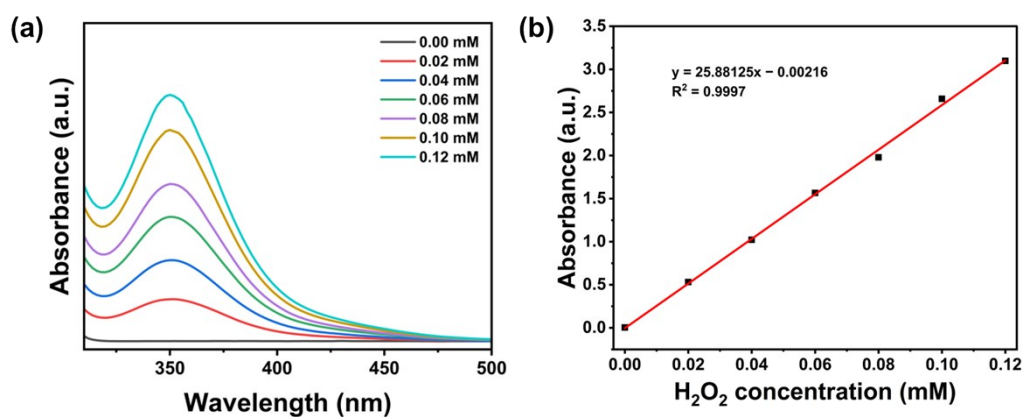

**Fig. S19** (a) UV-vis absorption spectra of various H<sub>2</sub>O<sub>2</sub> concentrations obtained via iodometric titration. (b) Corresponding calibration curve at the absorption peak of 350 nm. A known concentration of H<sub>2</sub>O<sub>2</sub> solution was added to KI solution, and the change of absorption intensity at 350 nm was measured by UV-vis spectrometer.

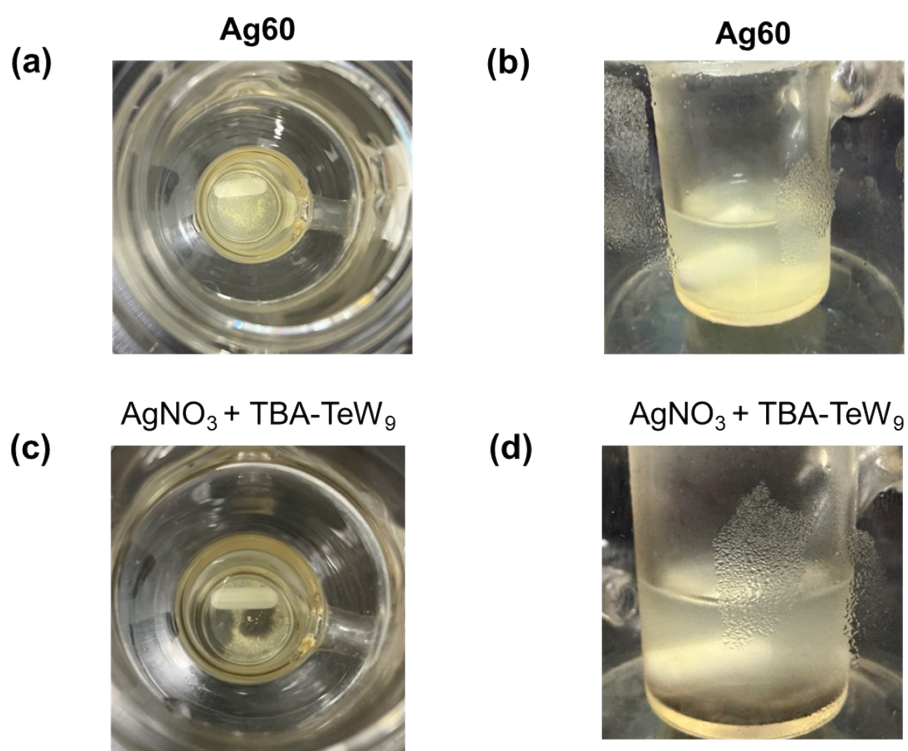

**Fig. S20** Phenomenon of photocatalytic H<sub>2</sub>O<sub>2</sub> production: (a) and (b) Photograph of the catalytic reaction solution after adding **Ag60**; (c) and (d) photograph of the catalytic reaction solution after adding AgNO<sub>3</sub> and TBA-TeW<sub>9</sub>O<sub>33</sub>.

**Table S1.** X-ray crystallographic data.

| Identification code                                                                                        | Ag60                                                                                                                               | Ag46                                                                                                               |
|------------------------------------------------------------------------------------------------------------|------------------------------------------------------------------------------------------------------------------------------------|--------------------------------------------------------------------------------------------------------------------|
| Empirical formula                                                                                          | C <sub>216</sub> H <sub>324</sub> Ag <sub>60</sub> Cl <sub>2</sub> N <sub>10</sub> O <sub>78</sub> Te <sub>2</sub> W <sub>12</sub> | C <sub>160</sub> H <sub>240</sub> Ag <sub>46</sub> N <sub>10</sub> O <sub>98</sub> Te <sub>2</sub> W <sub>26</sub> |
| Formula weight                                                                                             | 13313.33                                                                                                                           | 13868.93                                                                                                           |
| Temperature/K                                                                                              | 99.99(10)                                                                                                                          | 100.00(10)                                                                                                         |
| Crystal system                                                                                             | triclinic                                                                                                                          | triclinic                                                                                                          |
| Space group                                                                                                | P-1                                                                                                                                | P-1                                                                                                                |
| a/Å                                                                                                        | 19.0969(3)                                                                                                                         | 18.8818(2)                                                                                                         |
| b/Å                                                                                                        | 21.7033(4)                                                                                                                         | 20.9962(2)                                                                                                         |
| c/Å                                                                                                        | 25.4576(4)                                                                                                                         | 21.4281(2)                                                                                                         |
| α/°                                                                                                        | 71.606(2)                                                                                                                          | 75.5420(10)                                                                                                        |
| β/°                                                                                                        | 71.296(2)                                                                                                                          | 87.4930(10)                                                                                                        |
| γ/°                                                                                                        | 72.725(2)                                                                                                                          | 65.0760(10)                                                                                                        |
| Volume/Å <sup>3</sup>                                                                                      | 9255.8(3)                                                                                                                          | 7441.64(14)                                                                                                        |
| Z                                                                                                          | 1                                                                                                                                  | 1                                                                                                                  |
| ρ <sub>calc</sub> /cm <sup>3</sup>                                                                         | 2.388                                                                                                                              | 3.095                                                                                                              |
| μ/mm <sup>-1</sup>                                                                                         | 7.021                                                                                                                              | 13.199                                                                                                             |
| F(000)                                                                                                     | 6160.0                                                                                                                             | 6244.0                                                                                                             |
| Radiation                                                                                                  | Mo Kα (λ = 0.71073)                                                                                                                | Mo Kα (λ = 0.71073)                                                                                                |
| Index ranges                                                                                               | -23 ≤ h ≤ 26, -28 ≤ k ≤ 29,<br>-33 ≤ l ≤ 32                                                                                        | -26 ≤ h ≤ 27, -29 ≤ k ≤ 28,<br>-30 ≤ l ≤ 28                                                                        |
| Reflections collected                                                                                      | 122455                                                                                                                             | 122122                                                                                                             |
| Independent reflections                                                                                    | 43838                                                                                                                              | 38546                                                                                                              |
| Data/restraints/parameters                                                                                 | 43838/3/1426                                                                                                                       | 38546/11/1054                                                                                                      |
| Goodness-of-fit on F <sup>2</sup>                                                                          | 1.031                                                                                                                              | 1.046                                                                                                              |
| Final R indexes [I ≥ 2σ (I)]                                                                               | R <sub>1</sub> = 0.0599, wR <sub>2</sub> = 0.1496                                                                                  | R <sub>1</sub> = 0.0453, wR <sub>2</sub> = 0.1125                                                                  |
| Final R indexes [all data]                                                                                 | R <sub>1</sub> = 0.1075, wR <sub>2</sub> = 0.1805                                                                                  | R <sub>1</sub> = 0.0652, wR <sub>2</sub> = 0.1219                                                                  |
| $R_1 = \sum( F_o  -  F_c ) / \sum  F_o , wR_2 = \{ \sum [w(F_o^2 - F_c^2)^2] / \sum [w(F_o^2)^2] \}^{1/2}$ |                                                                                                                                    |                                                                                                                    |

**Table S2.** Selected bond distances (Å) for **Ag60**.

| Atom | Atom | Length/Å   | Atom | Atom | Length/Å   | Atom | Atom | Length/Å   |
|------|------|------------|------|------|------------|------|------|------------|
| W1   | O40  | 2.223(7)   | W5   | O7   | 2.266(7)   | Ag23 | C18  | 2.366(14)  |
| W1   | O33  | 1.921(7)   | W5   | O33  | 1.897(8)   | Ag23 | C93  | 2.144(14)  |
| W1   | O29  | 1.939(7)   | W5   | O37  | 1.949(7)   | Ag13 | Ag22 | 2.9669(14) |
| W1   | O34  | 1.743(12)  | Ag8  | O1   | 2.355(11)  | Ag13 | C11  | 2.484(4)   |
| W1   | O1   | 1.733(12)  | Ag8  | C72  | 2.213(13)  | Ag13 | O21  | 2.478(8)   |
| W1   | O10  | 2.226(7)   | Ag8  | C108 | 2.357(13)  | Ag13 | O34  | 2.343(11)  |
| W2   | O25  | 1.866(7)   | Ag8  | O6   | 2.541(7)   | Ag13 | C105 | 2.210(14)  |
| W2   | O38  | 2.167(7)   | Ag28 | C11  | 2.607(4)   | Ag13 | Ag2  | 2.9499(15) |
| W2   | O21  | 1.983(7)   | Ag28 | O28  | 2.315(7)   | Ag25 | C55  | 2.480(15)  |
| W2   | O31  | 1.763(12)  | Ag28 | Ag18 | 3.0993(15) | Ag20 | C57  | 2.207(13)  |
| W2   | O30  | 1.741(7)   | Ag28 | Ag4  | 2.9601(14) | Ag20 | C15  | 2.201(12)  |
| W2   | O10  | 2.256(7)   | Ag28 | C52  | 2.160(14)  | Ag20 | C50  | 2.530(12)  |
| W3   | O38  | 2.246(7)   | Ag30 | Ag15 | 3.0464(15) | Ag20 | C29  | 2.599(15)  |
| W3   | O28  | 2.254(7)   | Ag30 | C109 | 2.235(14)  | Ag21 | Ag17 | 3.2910(16) |
| W3   | O21  | 1.900(8)   | Ag30 | C57  | 2.298(14)  | Ag21 | Ag29 | 3.2993(16) |
| W3   | O35  | 1.930(8)   | Ag30 | C50  | 2.646(14)  | Ag21 | O20  | 2.541(12)  |
| W3   | O8   | 1.753(8)   | Ag26 | Ag24 | 2.9562(15) | Ag21 | C34  | 2.299(13)  |
| W3   | O32  | 1.739(8)   | Ag26 | O36  | 2.388(11)  | Ag21 | C45  | 2.208(12)  |
| W4   | O37  | 1.925(7)   | Ag26 | C72  | 2.161(12)  | Ag21 | C58  | 2.664(15)  |
| W4   | O28  | 2.277(7)   | Ag26 | C15  | 2.283(12)  | Ag14 | Ag27 | 2.8974(16) |
| W4   | O35  | 1.955(7)   | Ag23 | Ag27 | 3.1413(15) | Ag14 | Ag29 | 3.2154(16) |
| W4   | O16  | 1.769(9)   | Ag23 | Ag10 | 3.2578(17) | Ag14 | C44  | 2.187(15)  |
| W4   | O5   | 1.742(8)   | Ag23 | O35  | 2.397(8)   | Ag14 | C33  | 2.282(15)  |
| W4   | O6   | 2.240(8)   | Ag23 | C72  | 2.255(13)  | Ag14 | C101 | 2.476(14)  |
| Ag14 | O5   | 2.483(8)   | W5   | O27  | 1.752(7)   | Ag16 | C44  | 2.251(14)  |
| Ag11 | Ag9  | 3.3406(16) | W5   | O39  | 1.739(8)   | Ag16 | C73  | 2.423(14)  |
| Ag11 | Ag10 | 3.0447(16) | W5   | O6   | 2.215(7)   | Ag16 | Ag4  | 3.2991(15) |
| Ag11 | O9   | 2.579(12)  | W6   | O40  | 2.194(7)   | Ag16 | C104 | 2.170(13)  |
| Ag11 | C46  | 2.512(14)  | W6   | O25  | 1.936(7)   | Ag7  | Ag25 | 3.2071(16) |
| Ag11 | C47  | 2.256(12)  | W6   | O7   | 2.242(7)   | Ag7  | O11  | 2.507(11)  |
| Ag11 | C1   | 2.186(14)  | W6   | O29  | 1.930(8)   | Ag7  | O22  | 2.564(11)  |
| Ag9  | Ag10 | Ag9        | W6   | O26  | 1.746(7)   | Ag7  | Ag18 | 2.7349(14) |
| Ag9  | Ag5  | Ag9        | W6   | O36  | 1.729(12)  | Ag7  | Ag4  | 3.0935(16) |
| Ag9  | C100 | Ag9        | Te   | O40  | 1.906(7)   | Ag7  | C104 | 2.351(13)  |
| Ag9  | Ag2  | Ag9        | Te   | O7   | 1.908(7)   | Ag7  | C9   | 2.648(18)  |
| Ag9  | C1   | Ag9        | Te   | O38  | 1.956(7)   | Ag7  | C80  | 2.244(14)  |
| Ag10 | C93  | 2.171(17)  | Te   | O28  | 1.980(7)   | Ag24 | Ag20 | 2.9964(15) |
| Ag1  | Ag4  | 2.9929(16) | Te   | O10  | 1.904(7)   | Ag24 | O30  | 2.571(8)   |

---

|      |      |            |      |      |            |      |      |            |
|------|------|------------|------|------|------------|------|------|------------|
| Ag1  | C42  | 2.392(14)  | Te   | O6   | 1.950(7)   | Ag24 | O8   | 2.541(8)   |
| Ag1  | C104 | 2.400(13)  | Ag31 | Ag30 | 2.9088(14) | Ag24 | C15  | 2.129(13)  |
| Ag1  | O2   | 2.249(11)  | Ag31 | Ag24 | 3.1783(15) | Ag24 | C46  | 2.572(13)  |
| Ag18 | Ag4  | 3.0518(16) | Ag31 | Ag11 | 3.3115(14) | Ag24 | C47  | 2.280(13)  |
| Ag18 | C52  | 2.287(16)  | Ag31 | Ag22 | 3.2350(15) | Ag15 | Ag20 | 3.2393(15) |
| Ag18 | C80  | 2.156(15)  | Ag31 | C109 | 2.122(15)  | Ag15 | O27  | 2.147(7)   |
| Ag18 | C103 | 2.544(16)  | Ag31 | C47  | 2.088(14)  | Ag15 | C57  | 2.064(14)  |
| Ag12 | Ag21 | 3.0969(14) | Ag8  | Ag26 | 2.8072(14) | Ag25 | Ag21 | 3.0041(16) |
| Ag12 | Ag17 | 3.1249(15) | Ag8  | Ag3  | 3.1407(14) | Ag25 | Ag29 | 3.2531(17) |
| Ag12 | O31  | 2.106(12)  | Ag16 | Ag19 | 3.2941(15) | Ag25 | C45  | 2.073(17)  |
| Ag12 | C34  | 2.051(14)  | Ag16 | Ag1  | 2.9777(18) | Ag25 | C80  | 2.203(16)  |
| Ag16 | Ag7  | 3.0972(15) | Ag16 | O16  | 2.487(8)   | Ag27 | Ag10 | 3.3096(16) |
| Ag27 | C44  | 2.134(14)  | Ag22 | Ag2  | 3.1716(15) | Ag3  | C33  | 2.105(15)  |
| Ag27 | C93  | 2.181(15)  | Ag17 | Ag3  | 3.0648(16) | Ag19 | Ag5  | 2.8663(17) |
| Ag22 | C109 | 2.277(12)  | Ag17 | C34  | 2.229(14)  | Ag19 | Ag1  | 2.9310(17) |
| Ag22 | C85  | 2.419(12)  | Ag17 | C108 | 2.236(13)  | Ag19 | O32  | 2.486(8)   |
| Ag22 | C105 | 2.147(15)  | Ag17 | C102 | 2.534(14)  | Ag19 | O16  | 2.470(9)   |
| Ag5  | C11  | 2.489(4)   | Ag17 | C58  | 2.591(14)  | Ag19 | O12  | 2.276(13)  |
| Ag5  | C100 | 2.180(16)  | Ag29 | C45  | 2.183(13)  | Ag19 | Ag4  | 3.0360(15) |
| Ag5  | Ag2  | 3.0388(16) | Ag29 | C33  | 2.193(16)  | Ag19 | C42  | 2.094(13)  |
| Ag5  | C42  | 2.396(14)  | Ag2  | C100 | 2.261(16)  | Ag4  | C42  | 2.488(14)  |
| Ag10 | C1   | 2.110(16)  | Ag2  | C87  | 2.607(18)  | Ag4  | C104 | 2.360(12)  |
| O26  | Ag18 | 2.352(8)   | Ag4  | C52  | 2.180(15)  | Ag2  | C105 | 2.209(16)  |

---

**Table S3.** Selected bond distances (Å) for **Ag46**.

| Atom | Atom | Length/Å   | Atom | Atom | Length/Å   | Atom | Atom | Length/Å   |
|------|------|------------|------|------|------------|------|------|------------|
| W1   | O51  | 2.218(6)   | W5   | O21  | 1.971(8)   | W2   | O26  | 2.220(8)   |
| W1   | O48  | 1.997(8)   | W5   | O38  | 1.817(7)   | W2   | O52  | 1.983(7)   |
| W1   | O30  | 2.100(6)   | W5   | O17  | 1.727(8)   | W2   | O18  | 1.916(7)   |
| W1   | O52  | 1.894(6)   | W5   | O33  | 2.310(7)   | W2   | O16  | 2.149(7)   |
| W1   | O50  | 1.764(6)   | W5   | O7   | 1.917(6)   | W2   | O49  | 1.771(7)   |
| W1   | O19  | 1.757(6)   | W5   | O42  | 1.992(8)   | W2   | O40  | 1.736(6)   |
| W3   | O51  | 2.189(6)   | W4   | O23  | 1.942(7)   | W6   | O7   | 1.924(7)   |
| W3   | O51  | 2.058(6)   | W4   | O18  | 1.949(7)   | W6   | O25  | 1.806(7)   |
| W3   | O48  | 1.948(8)   | W4   | O33  | 2.431(6)   | W6   | O29  | 1.736(7)   |
| W3   | O26  | 1.786(9)   | W4   | O42  | 1.895(9)   | W6   | O15  | 1.982(7)   |
| W3   | O30  | 1.877(6)   | W4   | O6   | 1.877(6)   | W6   | O2   | 2.005(6)   |
| W3   | O20  | 1.776(8)   | W4   | O39  | 1.704(8)   | W6   | O22  | 2.301(6)   |
| W7   | O12  | 1.932(6)   | W8   | O43  | 2.142(6)   | W9   | O43  | 1.876(6)   |
| W7   | O24  | 1.879(6)   | W8   | O24  | 2.040(7)   | W9   | O12  | 1.936(7)   |
| W7   | O5   | 1.939(6)   | W8   | O20  | 2.217(8)   | W9   | O47  | 1.912(6)   |
| W7   | O15  | 1.891(7)   | W8   | O4   | 1.798(7)   | W9   | O10  | 2.304(7)   |
| W7   | O22  | 2.386(7)   | W8   | O41  | 1.752(7)   | W9   | O44  | 1.916(6)   |
| W7   | O9   | 1.729(7)   | W8   | O8   | 1.813(7)   | W9   | O36  | 1.715(7)   |
| W10  | O23  | 1.903(7)   | W11  | O47  | 1.930(7)   | W12  | O46  | 1.886(7)   |
| W10  | O16  | 1.879(6)   | W11  | O35  | 1.901(7)   | W12  | O33  | 2.479(6)   |
| W10  | O45  | 1.944(7)   | W11  | O1   | 1.902(7)   | W12  | O1   | 1.913(7)   |
| W10  | O10  | 2.347(6)   | W11  | O45  | 1.919(7)   | W12  | O21  | 1.892(9)   |
| W10  | O44  | 1.938(7)   | W11  | O10  | 2.437(6)   | W12  | O6   | 1.931(6)   |
| W10  | O28  | 1.720(7)   | W11  | O31  | 1.707(8)   | W12  | O27  | 1.701(7)   |
| W13  | O5   | 1.899(7)   | Te   | O33  | 1.882(7)   | Ag6  | Ag15 | 2.9036(11) |
| W13  | O46  | 1.924(7)   | Te   | O22  | 1.887(6)   | Ag6  | Ag7  | 2.9203(11) |
| W13  | O35  | 1.922(7)   | Te   | O10  | 1.883(6)   | Ag6  | Ag16 | 3.2784(12) |
| W13  | O2   | 1.872(7)   | Ag12 | O51  | 2.172(7)   | Ag17 | Ag3  | 3.3371(12) |
| W13  | O22  | 2.467(6)   | Ag12 | O49  | 2.541(7)   | Ag17 | Ag14 | 2.9006(12) |
| W13  | O11  | 1.719(6)   | Ag12 | C63  | 2.130(16)  | Ag17 | Ag7  | 2.9824(12) |
| Ag1  | Ag11 | 2.9065(10) | Ag6  | O48  | 2.358(9)   | Ag17 | Ag20 | 3.1921(12) |
| Ag1  | Ag3  | 2.9145(11) | Ag6  | O38  | 2.308(7)   | Ag17 | Ag22 | 3.3411(15) |
| Ag1  | Ag14 | 3.0003(11) | Ag6  | O25  | 2.362(7)   | Ag17 | O4   | 2.228(7)   |
| Ag1  | O30  | 2.349(6)   | Ag6  | C81  | 2.171(15)  | Ag17 | C63  | 2.365(15)  |
| Ag1  | O43  | 2.504(6)   | Ag8  | Ag19 | 2.9443(11) | Ag17 | C18  | 2.143(15)  |
| Ag1  | O16  | 2.598(7)   | Ag8  | Ag24 | 3.0116(11) | Ag11 | Ag14 | 3.2307(12) |
| Ag4  | Ag8  | 2.9806(10) | Ag8  | C27  | 2.324(15)  | Ag11 | Ag2  | 2.9468(12) |
| Ag4  | Ag18 | 3.0110(12) | Ag8  | C66  | 2.414(15)  | Ag11 | C30  | 2.165(15)  |
| Ag4  | Ag9  | 3.0795(11) | Ag8  | C58  | 2.298(16)  | Ag11 | C46  | 2.282(15)  |
| Ag4  | O24  | 2.514(6)   | Ag12 | Ag17 | 2.8762(11) | Ag11 | C65  | 2.690(15)  |
| Ag4  | O50  | 2.473(6)   | Ag12 | Ag24 | 3.1826(12) | Ag15 | Ag7  | 3.1370(12) |

---

|      |      |            |      |      |            |      |      |            |
|------|------|------------|------|------|------------|------|------|------------|
| Ag4  | O25  | 2.316(7)   | Ag12 | Ag16 | 2.8387(12) | Ag15 | Ag2  | 3.0930(12) |
| Ag4  | C27  | 2.223(15)  | Ag12 | Ag22 | 3.0259(13) | Ag15 | Ag9  | 2.8579(12) |
| Ag19 | Ag24 | 3.3302(11) | Ag19 | C69  | 2.657(15)  | Ag15 | C81  | 2.162(16)  |
| Ag19 | Ag2  | 2.9191(12) | Ag24 | Ag18 | 3.3798(12) | Ag15 | C66  | 2.123(16)  |
| Ag19 | O40  | 2.600(7)   | Ag24 | Ag22 | 3.3341(13) | Ag21 | Ag10 | 3.0022(12) |
| Ag19 | C30  | 2.261(15)  | Ag21 | C24  | 2.158(15)  | Ag21 | Ag20 | 2.9840(12) |
| Ag19 | C58  | 2.160(15)  | Ag21 | C15  | 2.332(15)  | Ag21 | Ag5  | 3.1975(13) |
| Ag10 | Ag13 | 3.023(2)   | Ag21 | C75  | 2.542(15)  | Ag21 | O41  | 2.597(7)   |
| Ag10 | O41  | 2.477(7)   | Ag10 | O9   | 2.494(7)   | Ag21 | O36  | 2.491(8)   |
| Ag10 | C24  | 2.180(15)  | Ag20 | Ag22 | 3.2701(15) | Ag7  | C81  | 2.133(15)  |
| Ag10 | C60  | 2.343(15)  | Ag20 | C29  | 2.241(15)  | Ag7  | C18  | 2.151(15)  |
| Ag10 | C20  | 2.469(15)  | Ag20 | C15  | 2.137(15)  | Ag16 | O18  | 2.521(6)   |
| Ag10 | Ag23 | 3.182(11)  | Ag20 | C23  | 2.568(16)  | Ag16 | O38  | 2.188(7)   |
| Ag24 | O50  | 2.538(7)   | Ag5  | N6   | 2.171(16)  | Ag16 | C63  | 2.290(15)  |
| Ag24 | O8   | 2.322(7)   | Ag5  | C24  | 2.250(16)  | Ag16 | C70  | 2.468(15)  |
| Ag24 | C58  | 2.249(15)  | Ag5  | C78  | 2.600(16)  | Ag9  | O29  | 2.485(7)   |
| Ag24 | O49  | 2.513(7)   | Ag5  | N4   | 2.276(9)   | Ag9  | C27  | 2.381(16)  |
| Ag3  | Ag20 | 3.0267(12) | Ag22 | Ag13 | 2.840(3)   | Ag9  | C66  | 2.644(15)  |
| Ag3  | C46  | 2.266(15)  | Ag18 | Ag13 | 2.930(5)   | Ag9  | N5   | 2.283(11)  |
| Ag3  | C15  | 2.141(15)  | Ag18 | C27  | 2.238(15)  | Ag14 | C18  | 2.278(16)  |
| Ag14 | Ag7  | 2.9211(12) | Ag18 | C60  | 2.129(15)  | Ag2  | O32  | 2.424(10)  |
| Ag14 | O19  | 2.542(7)   | Ag18 | C21  | 2.549(15)  | Ag2  | C30  | 2.133(16)  |
| Ag14 | O32  | 2.330(9)   | Ag18 | Ag23 | 3.337(17)  | Ag2  | C66  | 2.289(15)  |
| Ag14 | C46  | 2.220(16)  | Ag23 | C23  | 2.690(19)  | Ag2  | C47  | 2.615(15)  |
| Ag13 | C60  | 2.116(16)  | Ag22 | C63  | 2.276(15)  | Ag22 | Ag23 | 3.056(11)  |
| Ag13 | C29  | 2.175(16)  | Ag22 | C29  | 2.138(15)  | Ag22 | N2   | 2.333(10)  |
| Ag23 | C60  | 2.196(18)  | Ag23 | C29  | 2.079(17)  |      |      |            |

---

**Table S4.** BVS values for W and Te atoms of **Ag60**.

|    |       |    |       |
|----|-------|----|-------|
| W1 | 6.047 | W4 | 5.773 |
| W2 | 6.019 | W5 | 5.989 |
| W3 | 6.001 | W6 | 6.054 |
| Te | 5.749 |    |       |

**Table S5.** BVS values for W and Te atoms of **Ag46**.

|     |       |     |       |
|-----|-------|-----|-------|
| W1  | 5.976 | W7  | 6.027 |
| W2  | 5.930 | W8  | 5.972 |
| W3  | 6.085 | W9  | 6.161 |
| W4  | 6.055 | W10 | 6.037 |
| W5  | 6.008 | W11 | 6.055 |
| W6  | 5.944 | W12 | 6.143 |
| W13 | 6.081 | Te  | 3.857 |

**Table S6.** Comparison of photocatalytic H<sub>2</sub>O<sub>2</sub> production among recently reported materials.

| Samples                                                          | Solutions        | [Cat.]/ g L <sup>-1</sup> | Light         | H <sub>2</sub> O <sub>2</sub> yield<br>μmol g <sup>-1</sup> h <sup>-1</sup> | Ref. |
|------------------------------------------------------------------|------------------|---------------------------|---------------|-----------------------------------------------------------------------------|------|
| Ag60                                                             | 10 % vol IPA     | 0.2                       | Xenon lamp    | 6752.1                                                                      | This |
| Ag46                                                             | 10 % vol IPA     | 0.2                       | Xenon lamp    | 5334.2                                                                      | Work |
| CityU-40                                                         | Pure water       | 1                         | λ = 380~1100  | 342.5                                                                       | This |
| TF <sub>50</sub> -COF                                            | 10 % vol Ethanol | 0.1                       | nm            | 1739                                                                        | Work |
| Ag@U-g-C <sub>3</sub> N <sub>4</sub>                             | Pure water       | 1                         | λ ≥ 400 nm    | 24.84                                                                       | 4    |
| W <sub>18</sub> O <sub>49</sub> @g-C <sub>3</sub> N <sub>4</sub> | Pure water       | 0.2                       | Xenon lamp    | 71                                                                          | 5    |
| DDCN                                                             | Pure water       | 0.2                       | λ ≥ 400 nm    | 192                                                                         | 6    |
| PEI/C <sub>3</sub> N <sub>4</sub>                                | Pure water       | 1                         | λ ≥ 420 nm    | 208                                                                         | 7    |
| Cv-g-C <sub>3</sub> N <sub>4</sub>                               | Pure water       | 1                         | AM 1.5G       | 92                                                                          | 8    |
| ACN                                                              | 10 % vol IPA     | 0.5                       | λ ≥ 400 nm    | 1874                                                                        | 9    |
| Py-OH-Sa-COF                                                     | 10 % vol IPA     | 0.1                       | λ ≥ 420 nm    | 4780                                                                        | 10   |
| fl-CN-530                                                        | 10 % vol Ethanol | 0.5                       | full spectrum | 952.3                                                                       | 11   |
|                                                                  |                  |                           | λ ≥ 420 nm    |                                                                             | 12   |
|                                                                  |                  |                           |               |                                                                             | 13   |

## References

1. O. V. Dolomanov, L. J. Bourhis, R. J. Gildea, J. A. K. Howard and H. Puschmann, OLEX2: a complete structure solution, refinement and analysis program, *J. Appl. Crystallogr.*, 2009, **42**, 339-341.
2. G. Sheldrick, Combining biophysical methods for the analysis of protein complex stoichiometry and affinity in SEDPHAT, *Acta Crystallogr. Sect. C*, 2015, **71**, 3-8.
3. N. E. Brese and M. O'Keeffe, Bond-valence parameters for solids, *Acta Crystallogr. Sect. B*, 1991, **47**, 192-197.
4. L. Zhang, Z. Chen, X.-X. Li, X. Wang, Q. Gu, Z. Zheng, N. Aratani, C.-S. Lee, Y.-Q. Lan and Q. Zhang, Constructing Dual-Functional Organic Cuboctahedron Cages with Two Different Triangular Building Units for Efficient Artificial Photosynthesis of Hydrogen Peroxide from Water and Oxygen, *J. Am. Chem. Soc.*, 2025, **147**, 27847-27854.
5. H. Wang, C. Yang, F. Chen, G. Zheng and Q. Han, A Crystalline Partially Fluorinated Triazine Covalent Organic Framework for Efficient Photosynthesis of Hydrogen Peroxide, *Angew. Chem. Int. Ed.*, 2022, **61**, e202202328.
6. J. Cai, J. Huang, S. Wang, J. Iocozzia, Z. Sun, J. Sun, Y. Yang, Y. Lai and Z. Lin, Crafting Mussel-Inspired Metal Nanoparticle-Decorated Ultrathin Graphitic Carbon Nitride for the Degradation of Chemical Pollutants and Production of Chemical Resources, *Adv. Mater.*, 2019, **31**, 1806314.
7. X. Li, F. Ye, H. Zhang, M. Ahmad, Z. Zeng, S. Wang, S. Wang, D. Gao and Q. Zhang, Ternary rGO decorated  $W_{18}O_{49}@g-C_3N_4$  composite as a full-spectrum-responded Z-scheme photocatalyst for efficient photocatalytic  $H_2O_2$  production and water disinfection, *J. Environ. Chem. Eng.*, 2023, **11**, 110329.
8. G. Ba, H. Hu, F. Bi, J. Yu, E. Liu, J. Ye and D. Wang, Engineering nitrogen vacancies and cyano groups into  $C_3N_4$  nanosheets for highly efficient photocatalytic  $H_2O_2$  production, *Appl. Catal. B*, 2025, **361**, 124645.
9. X. Zeng, Y. Liu, Y. Kang, Q. Li, Y. Xia, Y. Zhu, H. Hou, M. H. Uddin, T. R. Gengenbach, D. Xia, C. Sun, D. T. McCarthy, A. Deletic, J. Yu and X. Zhang, Simultaneously Tuning Charge Separation and Oxygen Reduction Pathway on Graphitic Carbon Nitride by Polyethylenimine for Boosted Photocatalytic Hydrogen Peroxide Production, *ACS Catal.*, 2020, **10**, 3697-3706.
10. S. Li, G. Dong, R. Hailili, L. Yang, Y. Li, F. Wang, Y. Zeng and C. Wang, Effective photocatalytic  $H_2O_2$  production under visible light irradiation at g- $C_3N_4$  modulated by carbon vacancies, *Appl. Catal. B*, 2016, **190**, 26-35.
11. Y. Zheng, Y. Luo, Q. Ruan, S. Wang, J. Yu, X. Guo, W. Zhang, H. Xie, Z. Zhang and Y. Huang, Plasma-induced hierarchical amorphous carbon nitride nanostructure with two  $N_2C$ -site vacancies for photocatalytic  $H_2O_2$  production, *Appl. Catal. B*, 2022, **311**, 121372.
12. P. Huang, Y.-Y. Peng, X.-H. Wang, R.-H. Li, M.-H. Qin, M. Zhang, S.-M. Wang, M. Lu, S.-L. Li and Y.-Q. Lan, Charge-Distribution and Microenvironment Dual Regulation of Covalent Organic Frameworks for Enhancing Photocatalytic  $H_2O_2$  and  $H_2$  Production, *Adv. Mater.*, 2026, **38**, e07849.
13. B. Feng, Y. Liu, K. Wan, S. Zu, Y. Pei, X. Zhang, M. Qiao, H. Li and B. Zong, Tailored Exfoliation of Polymeric Carbon Nitride for Photocatalytic  $H_2O_2$  Production and  $CH_4$  Valorization Mediated by  $O_2$  Activation, *Angew. Chem. Int. Ed.*, 2024, **63**, e202401884.
